# Supplementary material
Source: publisher site journal article supplement (https://www.dovepress.com/article/575035)
Supplement: Supplementary file 1 [file 575035%20Supplementary%20Material.docx]

Original article

**Cordycepin improve intestinal inflammation and intestinal barrier function by activating adenosine receptor A2A in dextran sulfate sodium-induced ulcerative colitis**

**Table S1**.Disease activity index

| Score | Weight loss | Stool consistency | Blood |
| --- | --- | --- | --- |
| 0 | None | Normal | Negative hemocult |
| 1 | 1-5% | Soft but still formed | Negative hemocult |
| 2 | 6-10% | Soft | Positive hemocult |
| 3 | 11-18% | Very soft; wet | Blood traces in stool visible |
| 4 | ＞18% | Watery diarrhea | Gross rectal bleeding |

**Table S2.** Histological grading of colitis

| Featuregraded | Grade | Description |
| --- | --- | --- |
| Inflammation | 0 | None |
| 1 | Slight |
| 2 | Moderate |
| 3 | Severe |
| Extent | 0 | None |
| 1 | Mucosa |
| 2 | Mucosa and submucosa |
| 3 | Transmural |
| Regeneration | 4 | No tissue repair |
| 3 | Surface epithelium not intact |
| 2 | Regeneration with crypt depletion |
| 1 | Almost complete regeneration |
| 0 | Complete regeneration or normal tissue |
| Cryptdamage | 0 | None |
| 1 | Basal 1/3 damaged |
| 2 | Basal 2/3 damaged |
| 3 | Only surface epithelium intact |
| 4 | Entire crypt and epithelium lost |
| Percent involvement | 1 | 1-25% |
| 2 | 26-50% |
| 3 | 51-75% |
| 4 | 76-100% |
